# Supplementary figures and images for: Distinct representations of body and head motion are dynamically encoded by Purkinje cell populations in the macaque cerebellum
Source: eLife journal article supplement (doi:10.7554/elife.75018), 2022-04-25

Figure 7 - figure supplement 2

### Unimodal Type I

A1

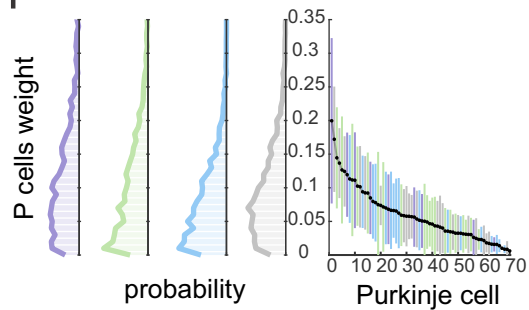

A2

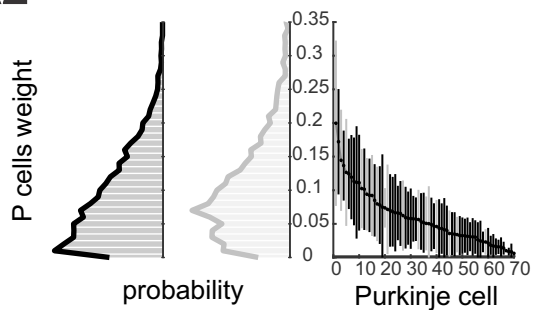

A3

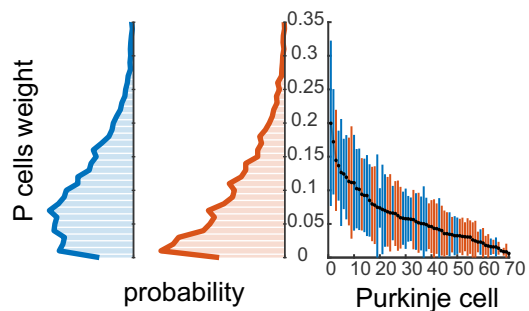

A4

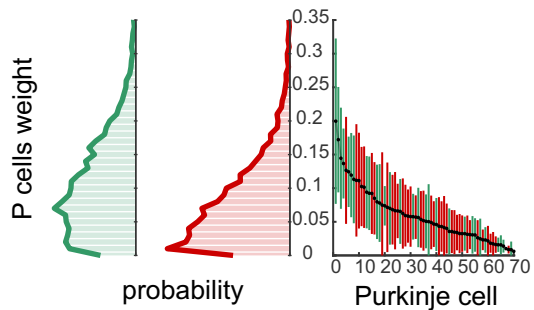

### Unimodal Type II

B1

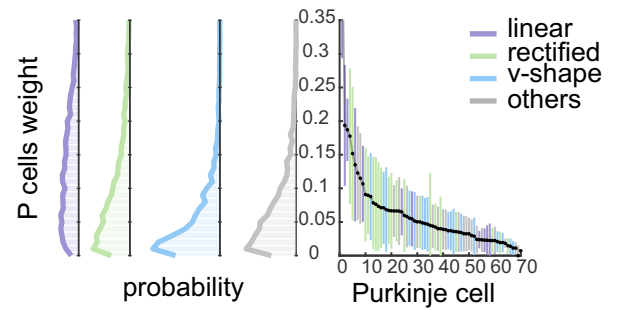

B2

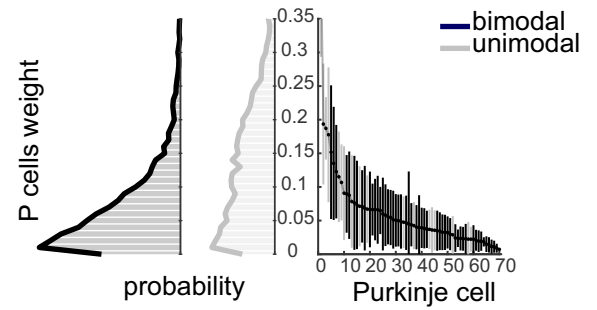

B3

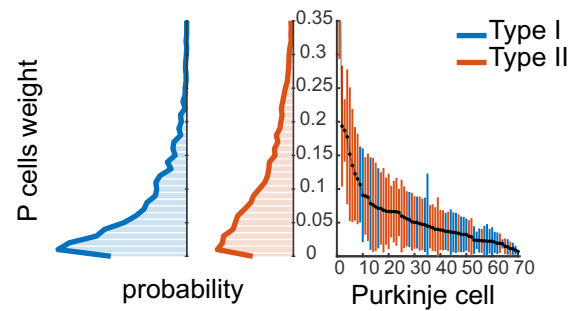

B4

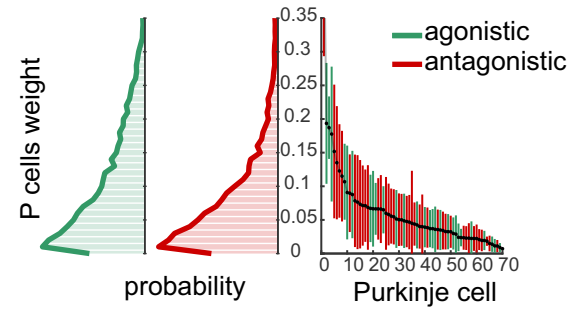

Supplement: supp [file elife-75018-supp-v1.zip]

Figure 2 - figure supplement 3

A

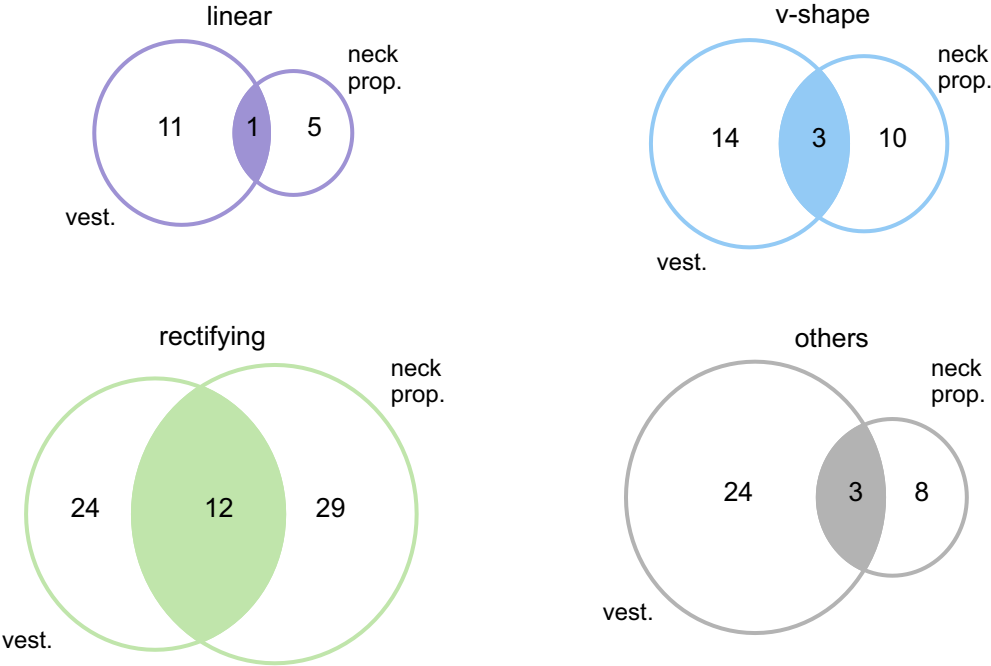

B

Change in Purkinje cells type

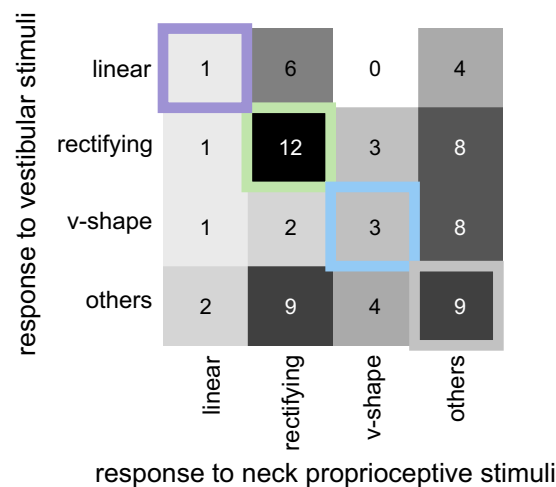

Supplement: supp [file elife-75018-supp-v1.zip]

Figure 1 - figure supplement 1

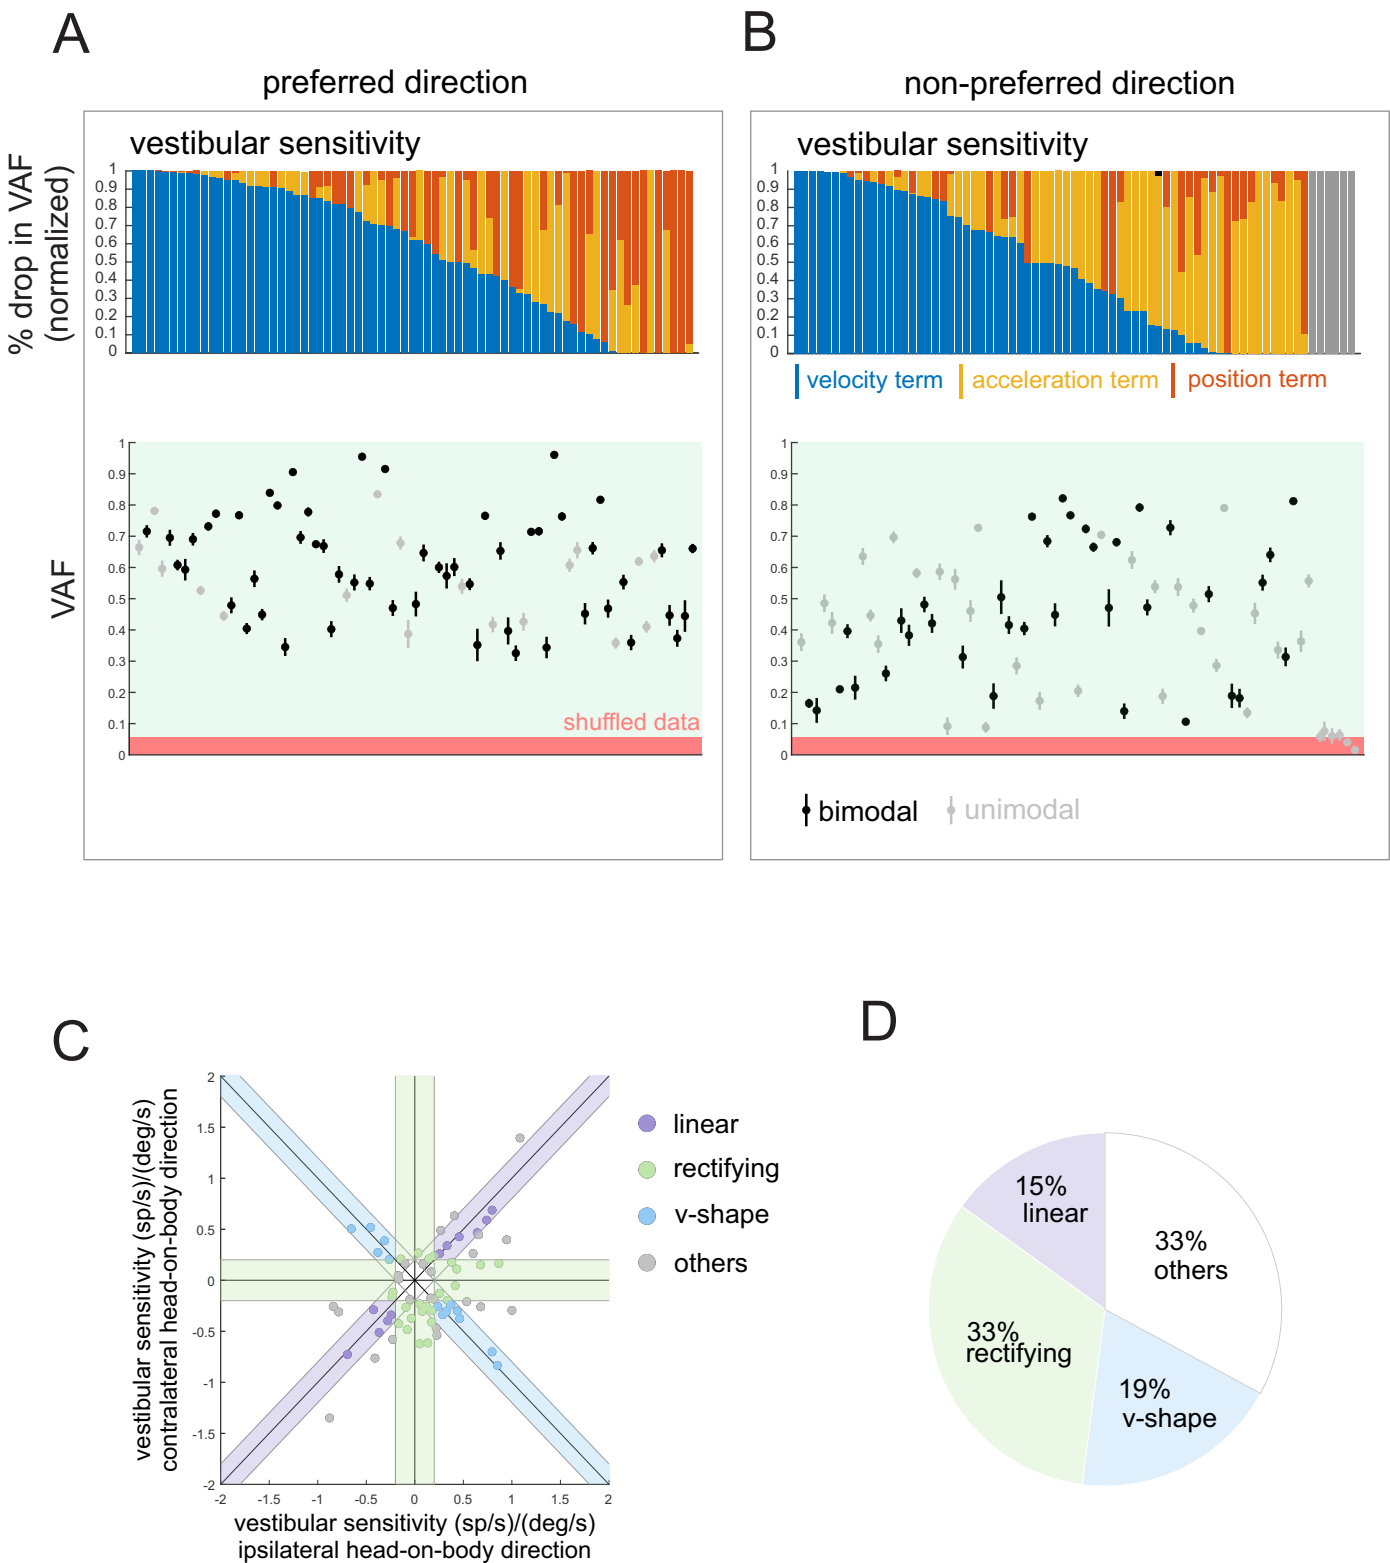

Supplement: supp [file elife-75018-supp-v1.zip]

# Figure 4 - figure supplement 1

## A

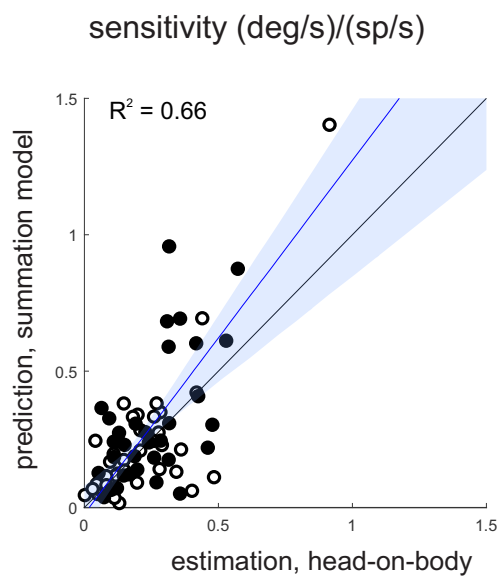

## B

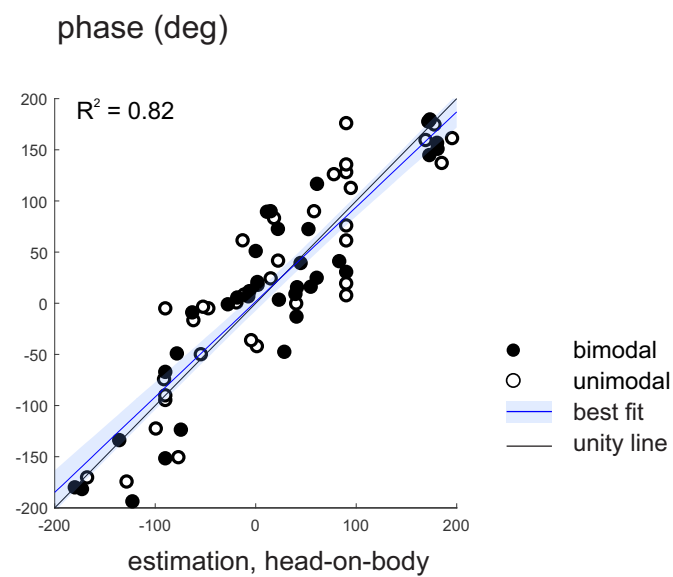

Supplement: supp [file elife-75018-supp-v1.zip]

Figure 3 - figure supplement 1

A

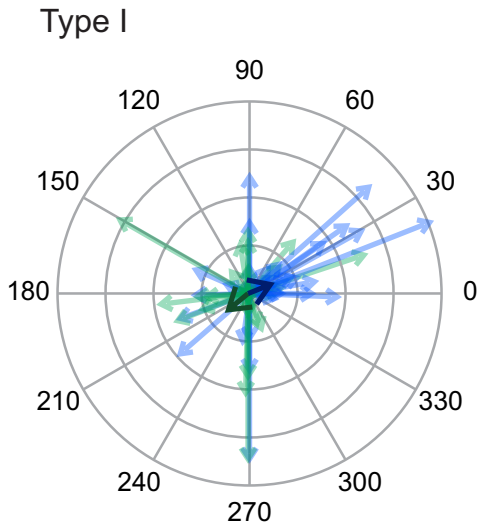

B

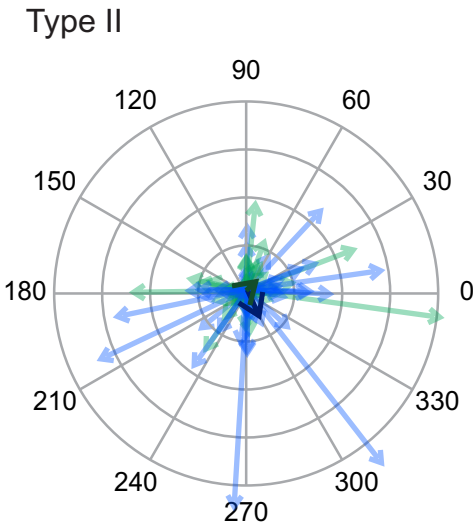

individual cell:  
vest.  
neck prop.

population average:  
vest.  
neck prop.

Supplement: supp [file elife-75018-supp-v1.zip]

Figure 2 - figure supplement 2

A

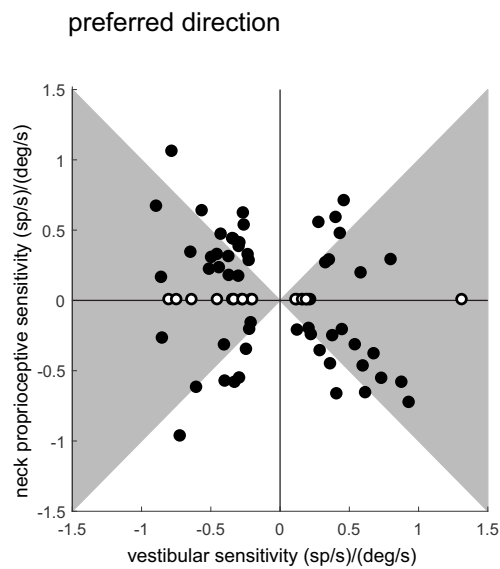

B

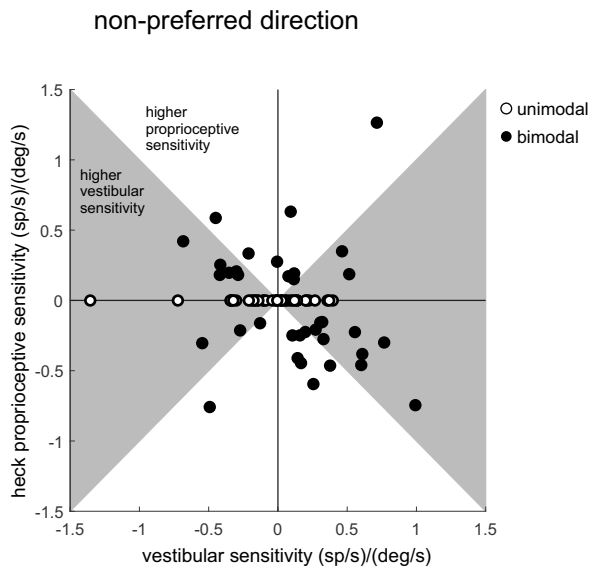

C

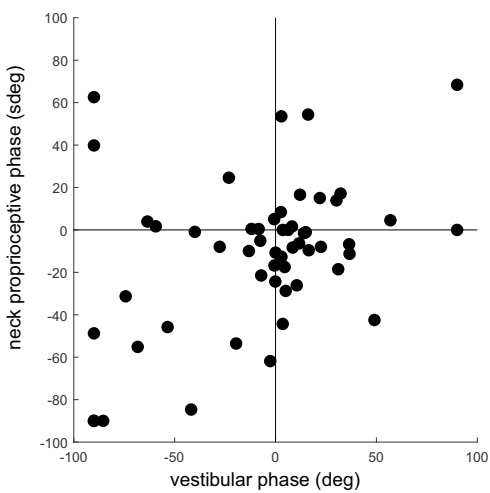

D

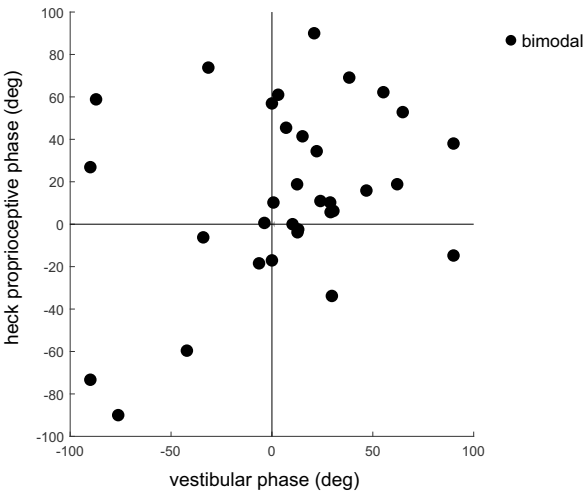

E

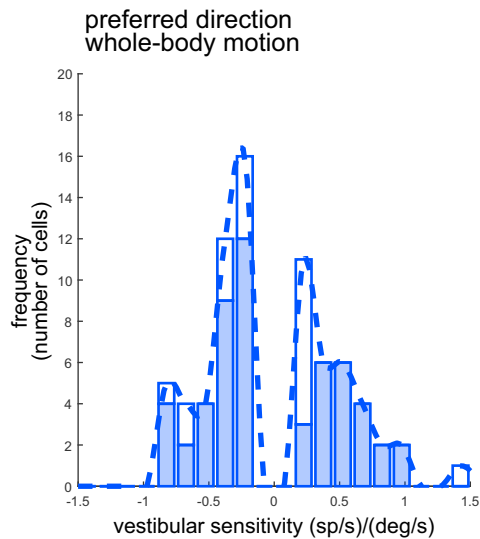

F

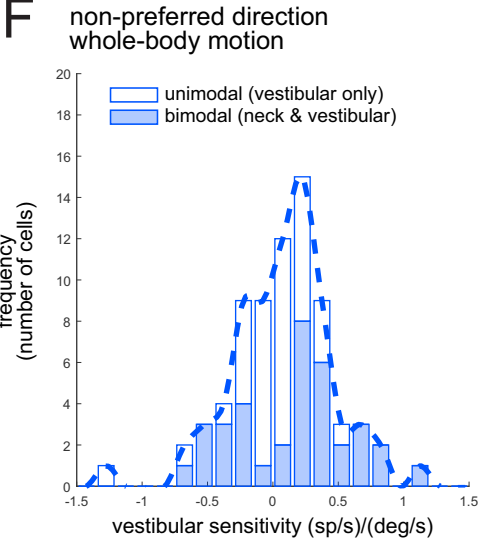

Supplement: supp [file elife-75018-supp-v1.zip]

Figure 7 - figure supplement 3

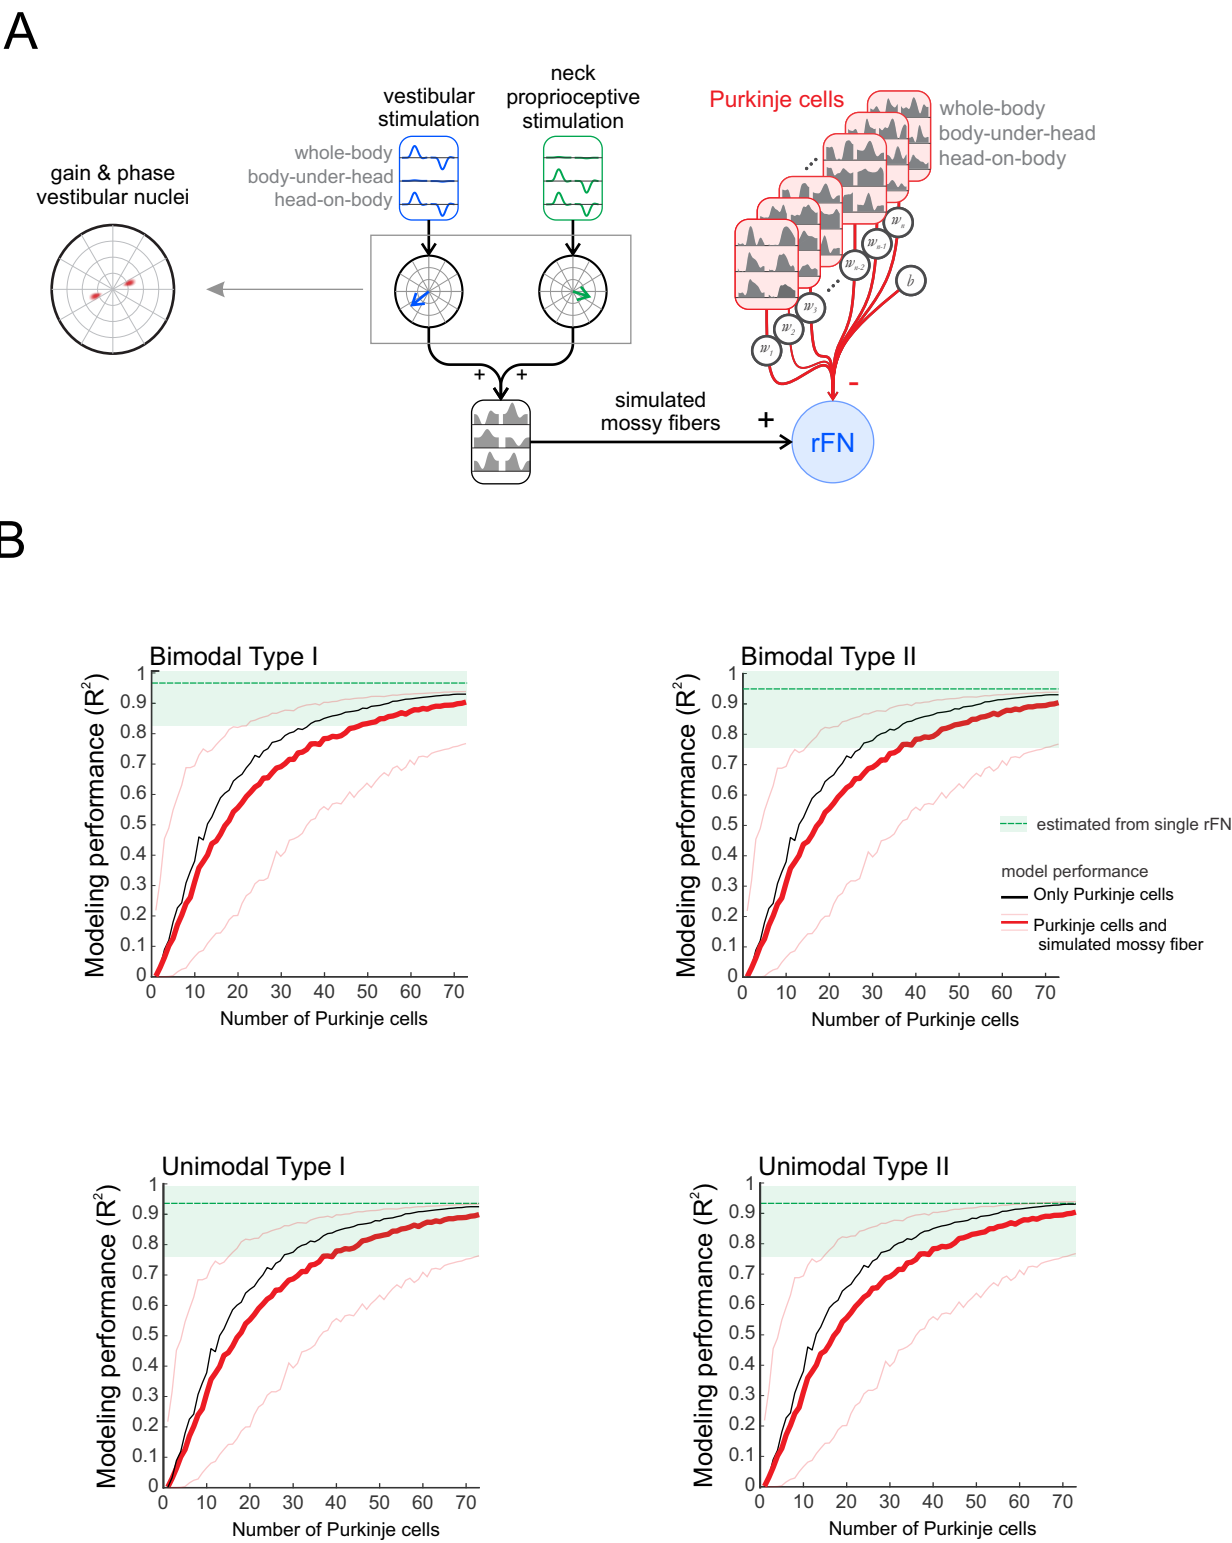

Supplement: supp [file elife-75018-supp-v1.zip]

# Figure 7 - figure supplement 5

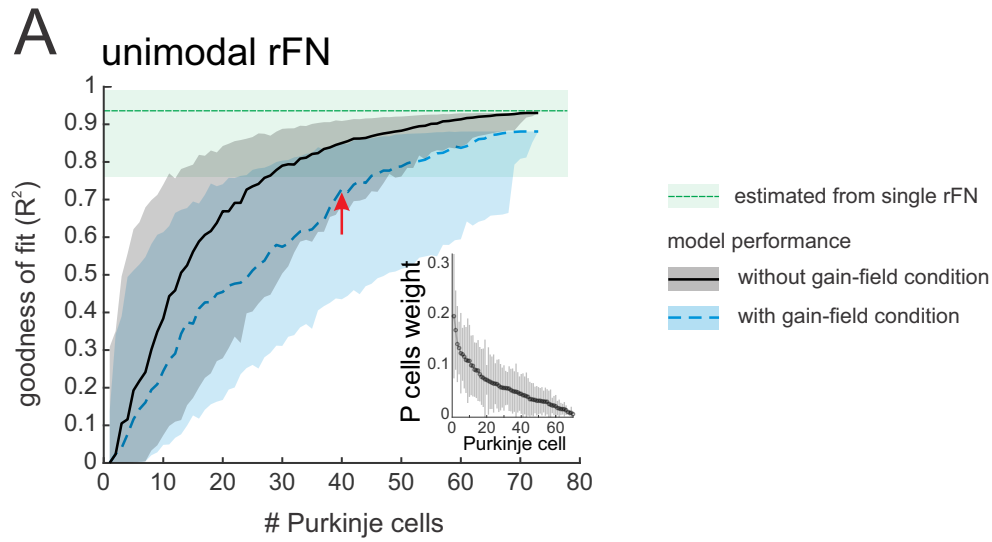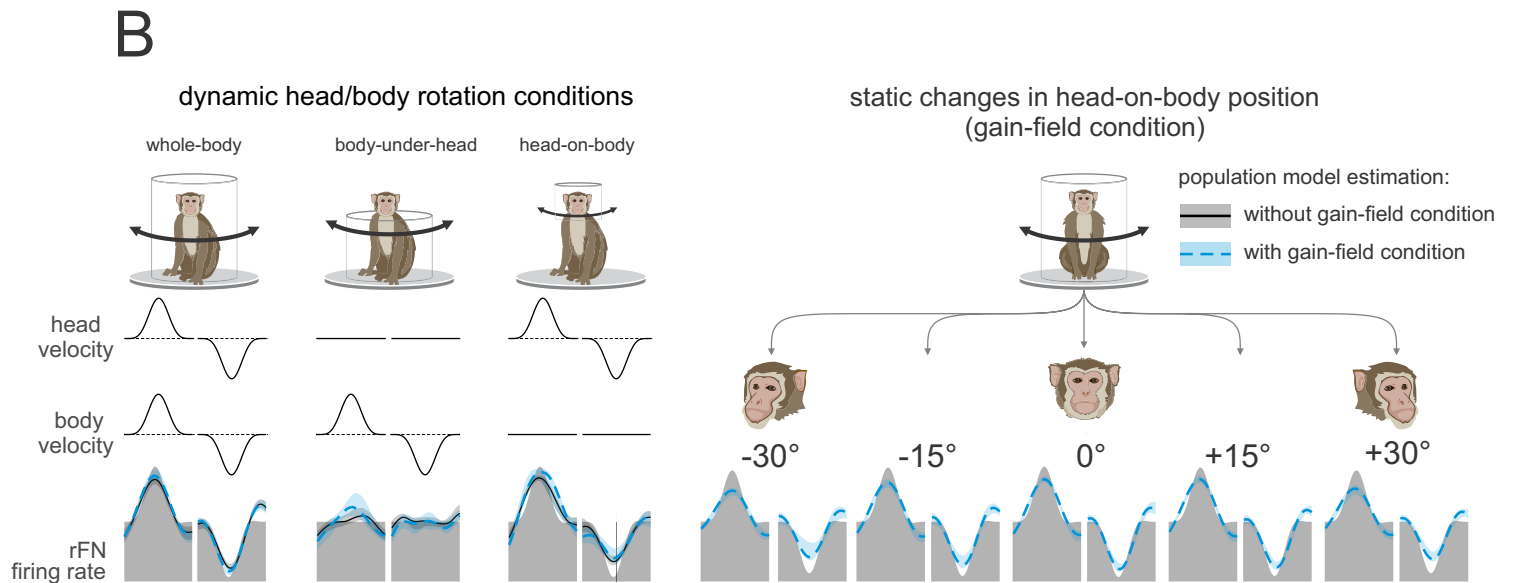

Supplement: supp [file elife-75018-supp-v1.zip]

Figure 7 - figure supplement 4

A

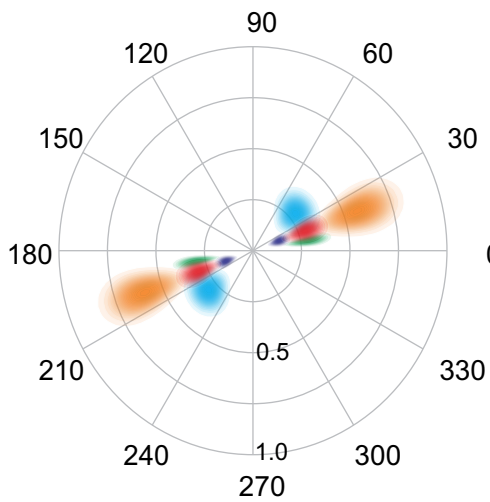

B

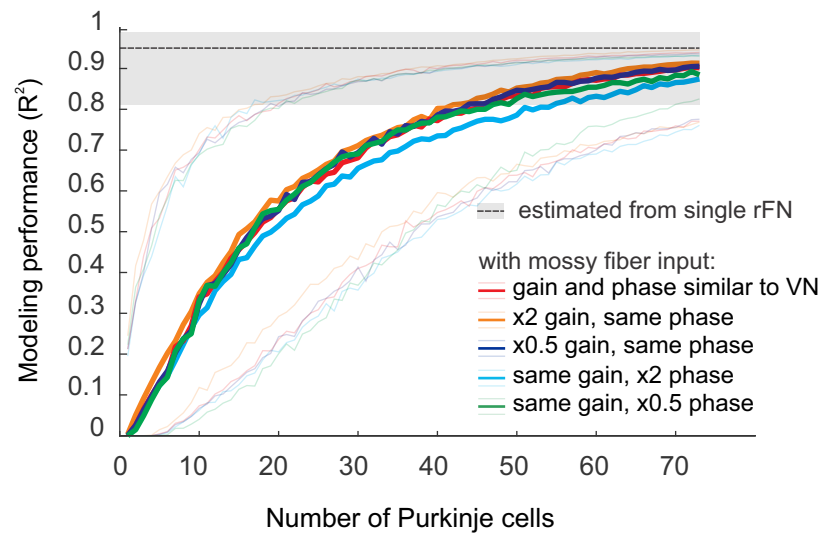

C

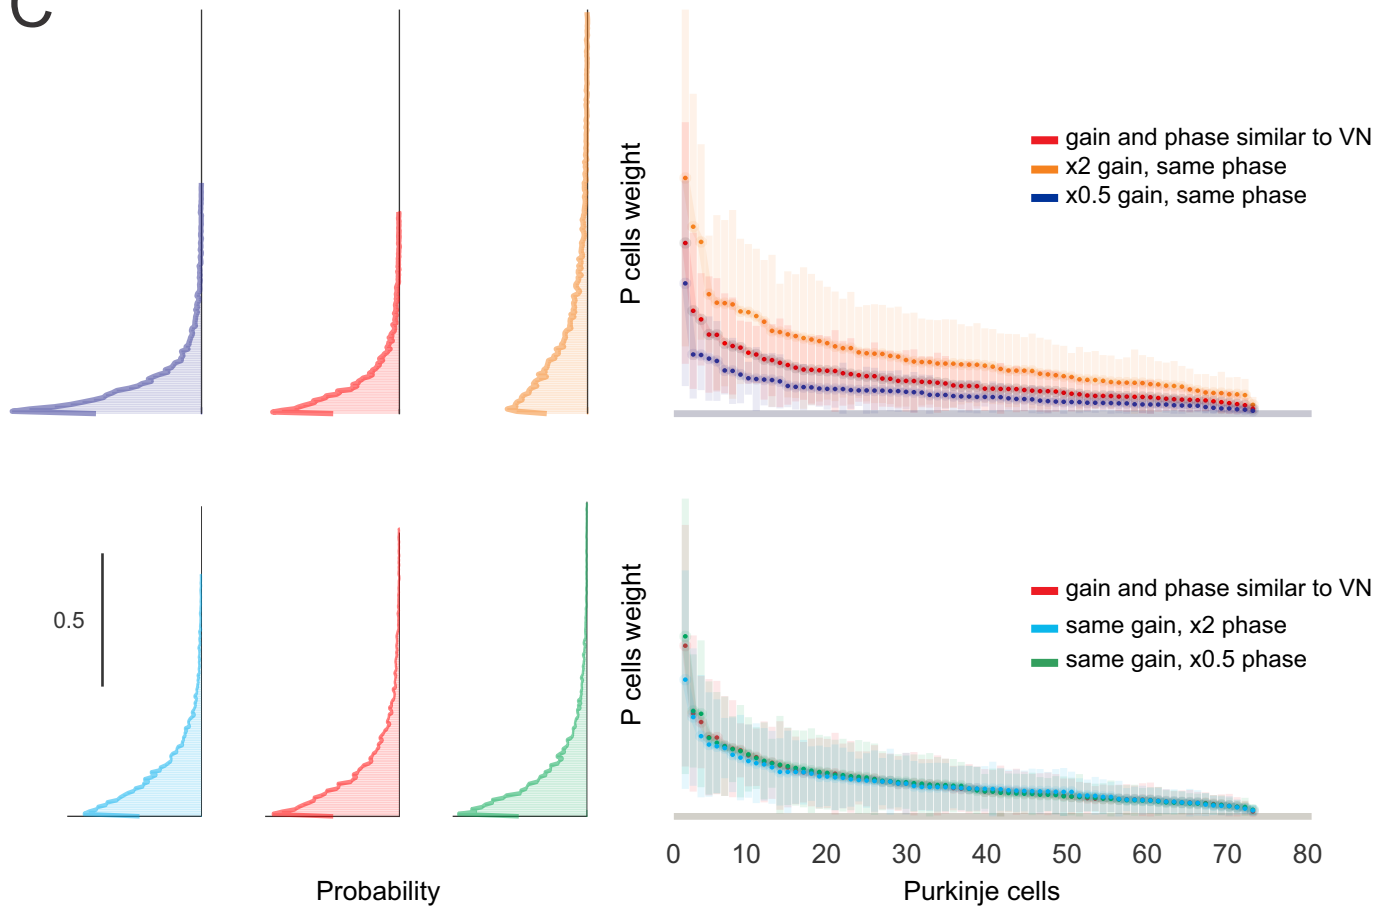

Supplement: supp [file elife-75018-supp-v1.zip]

Figure 3 - figure supplement 2

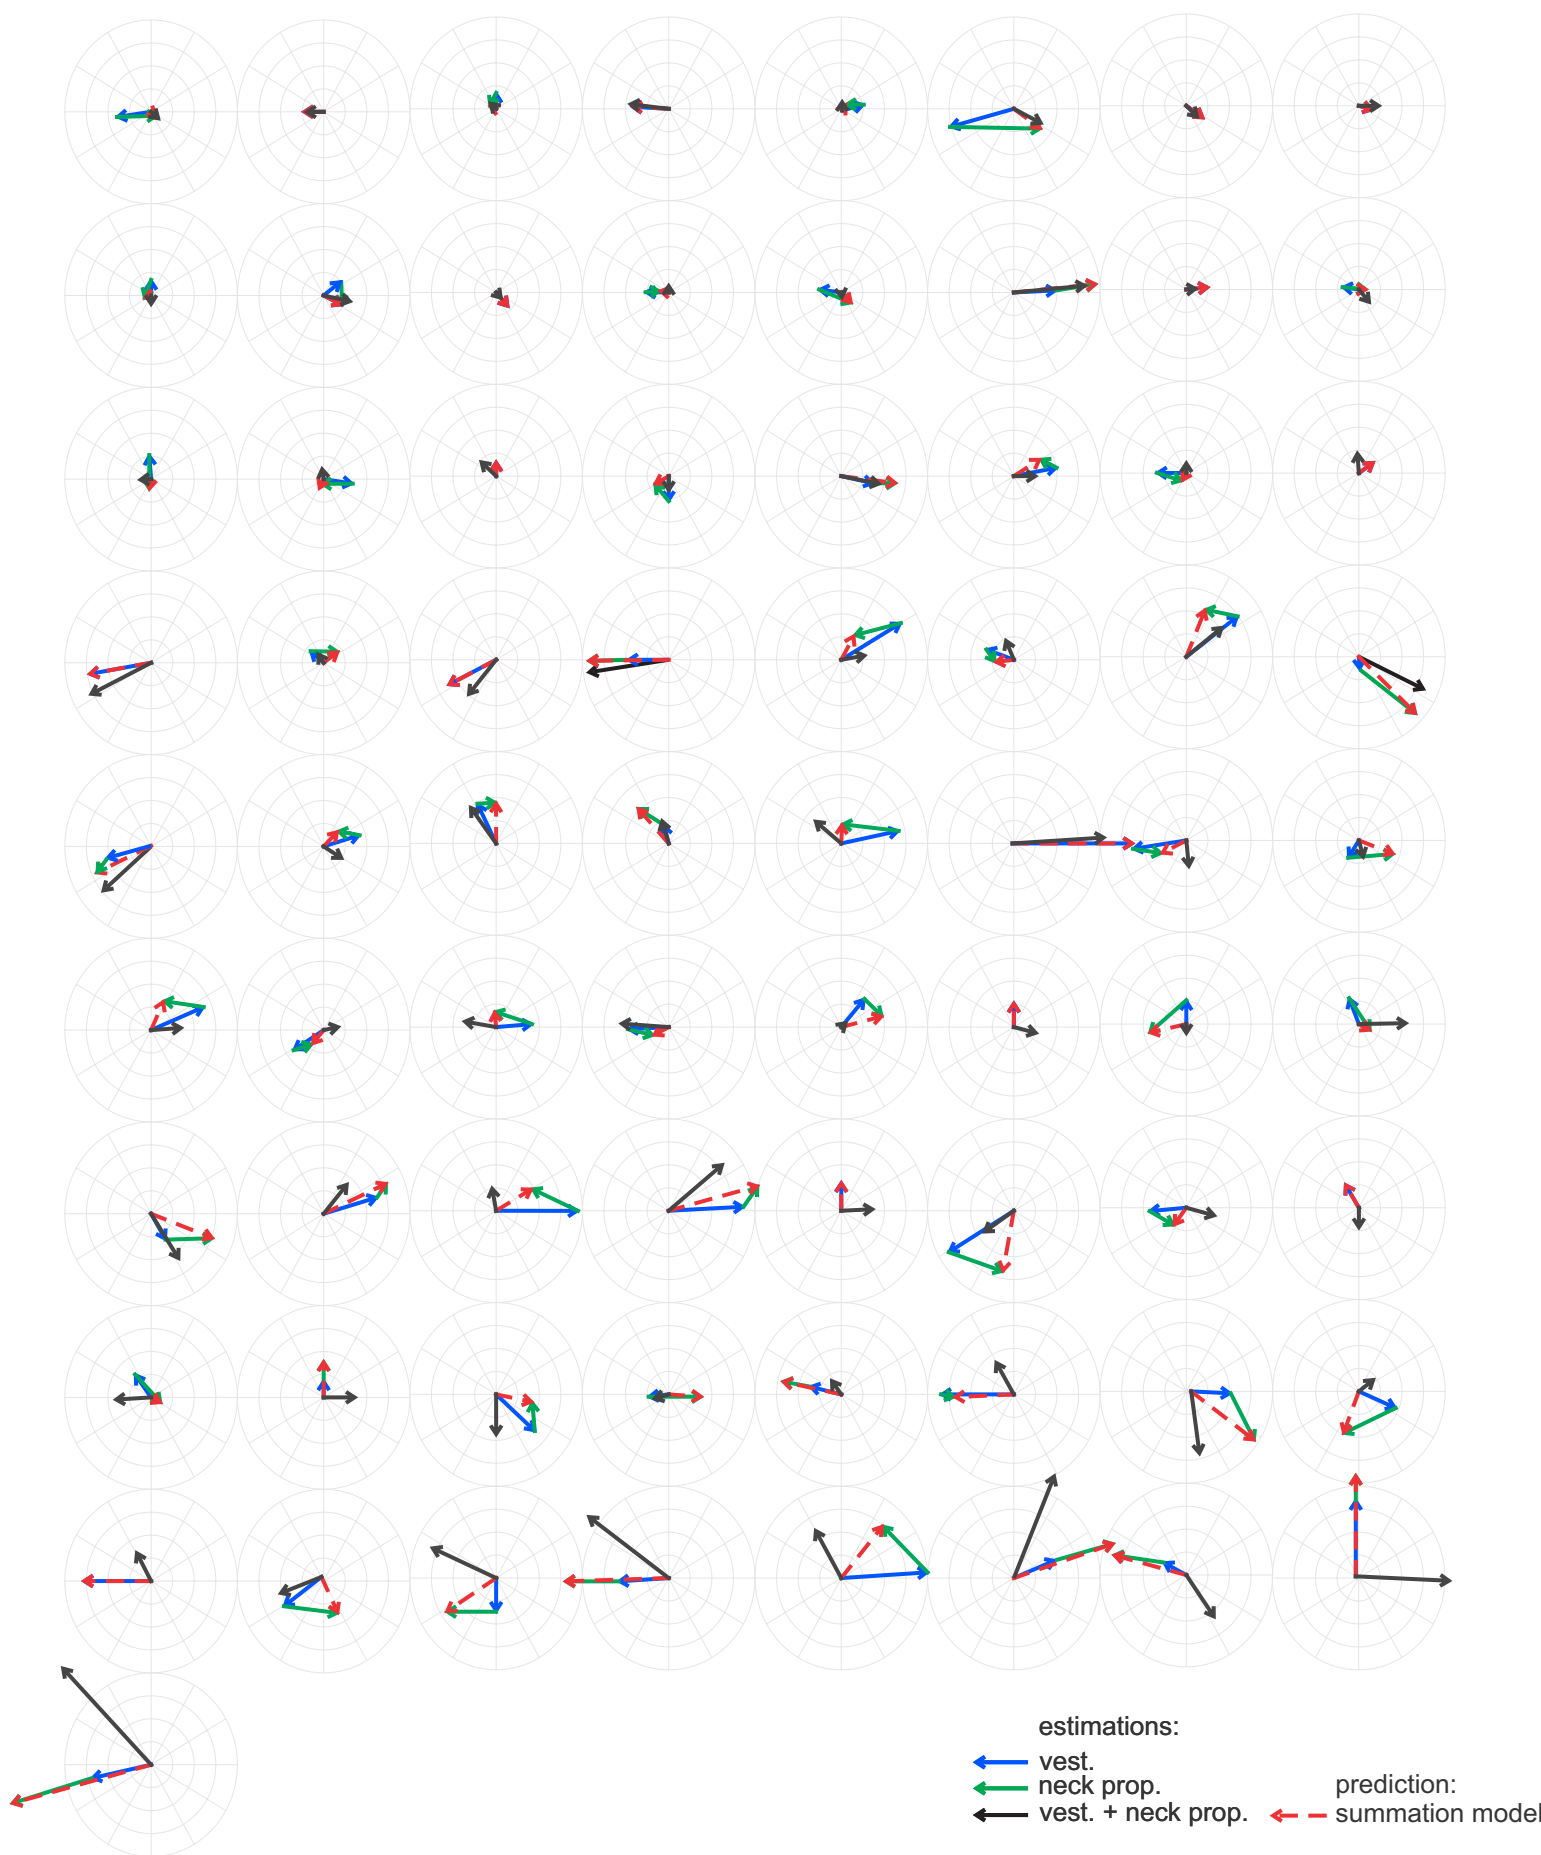

Supplement: supp [file elife-75018-supp-v1.zip]

Figure 7 - figure supplement 1

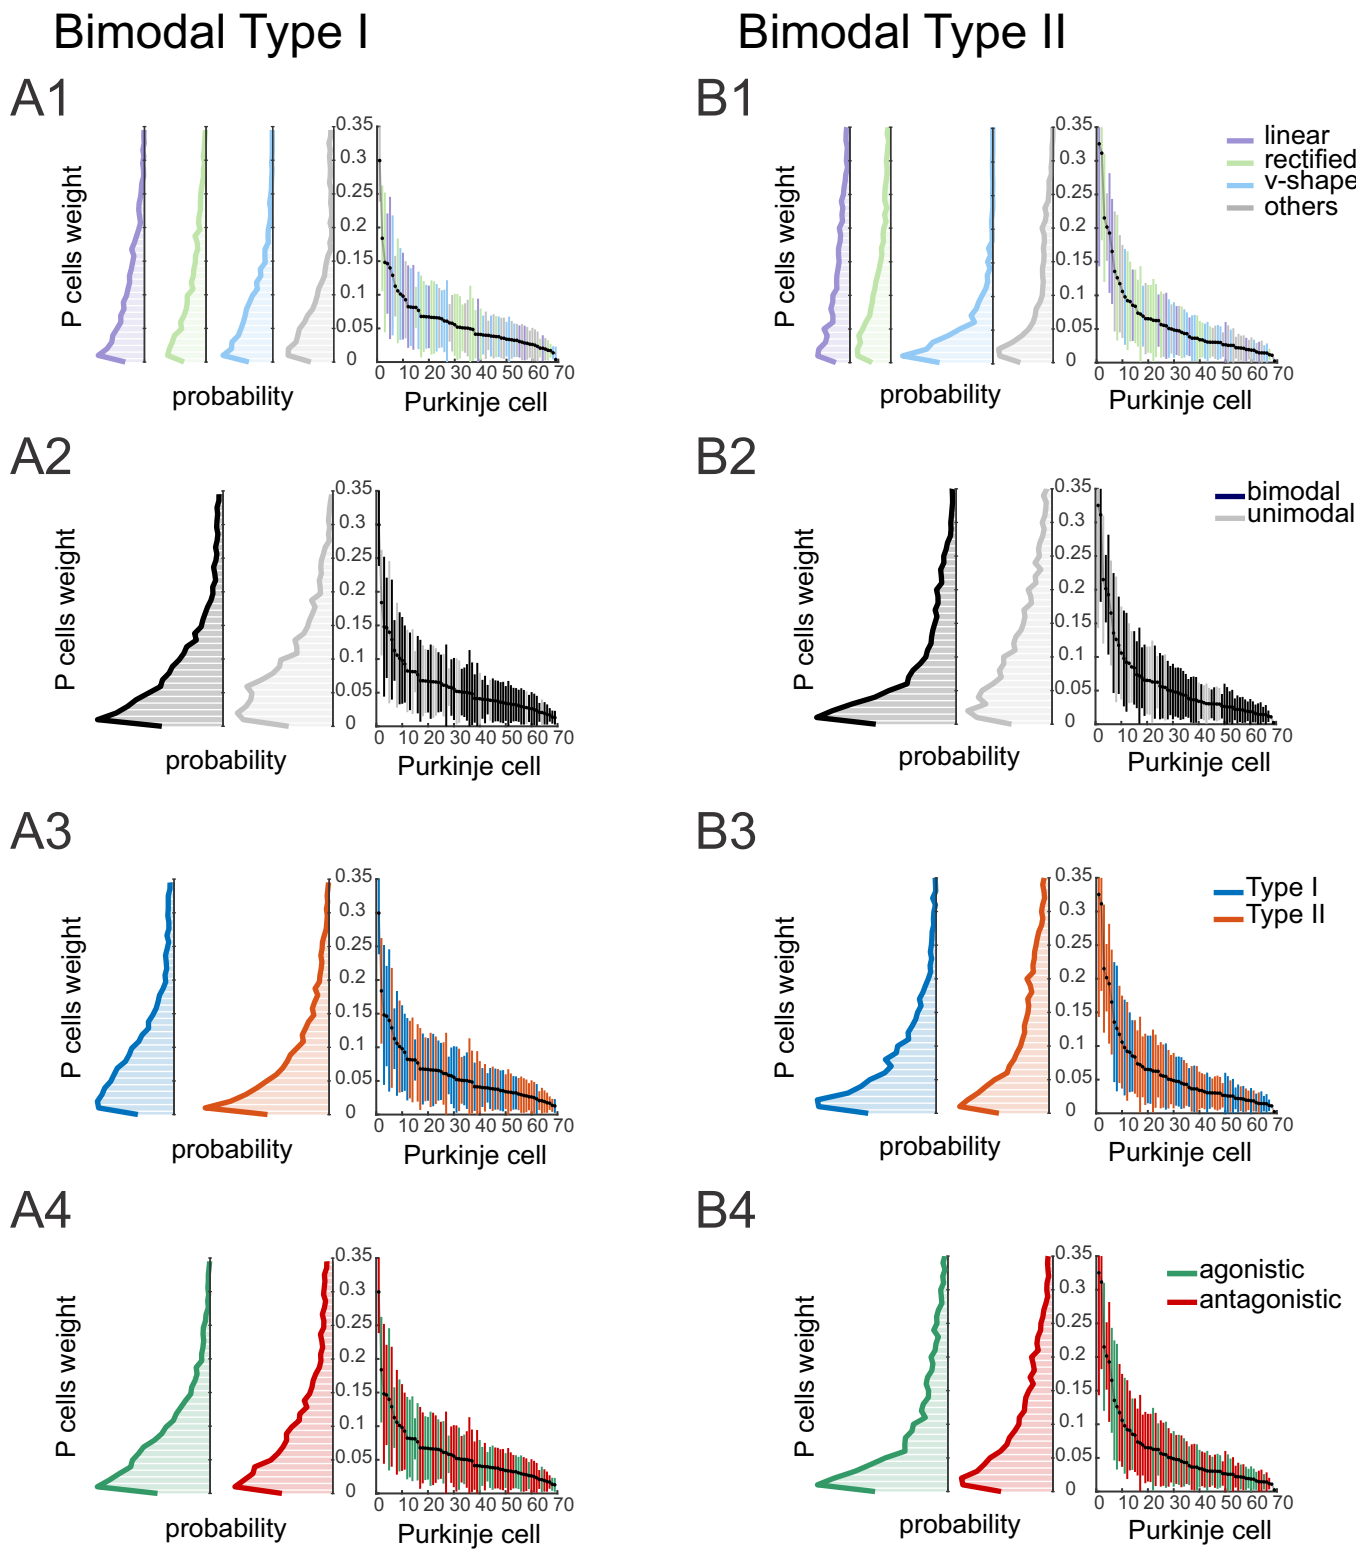

Supplement: supp [file elife-75018-supp-v1.zip]

Figure 2 - figure supplement 1

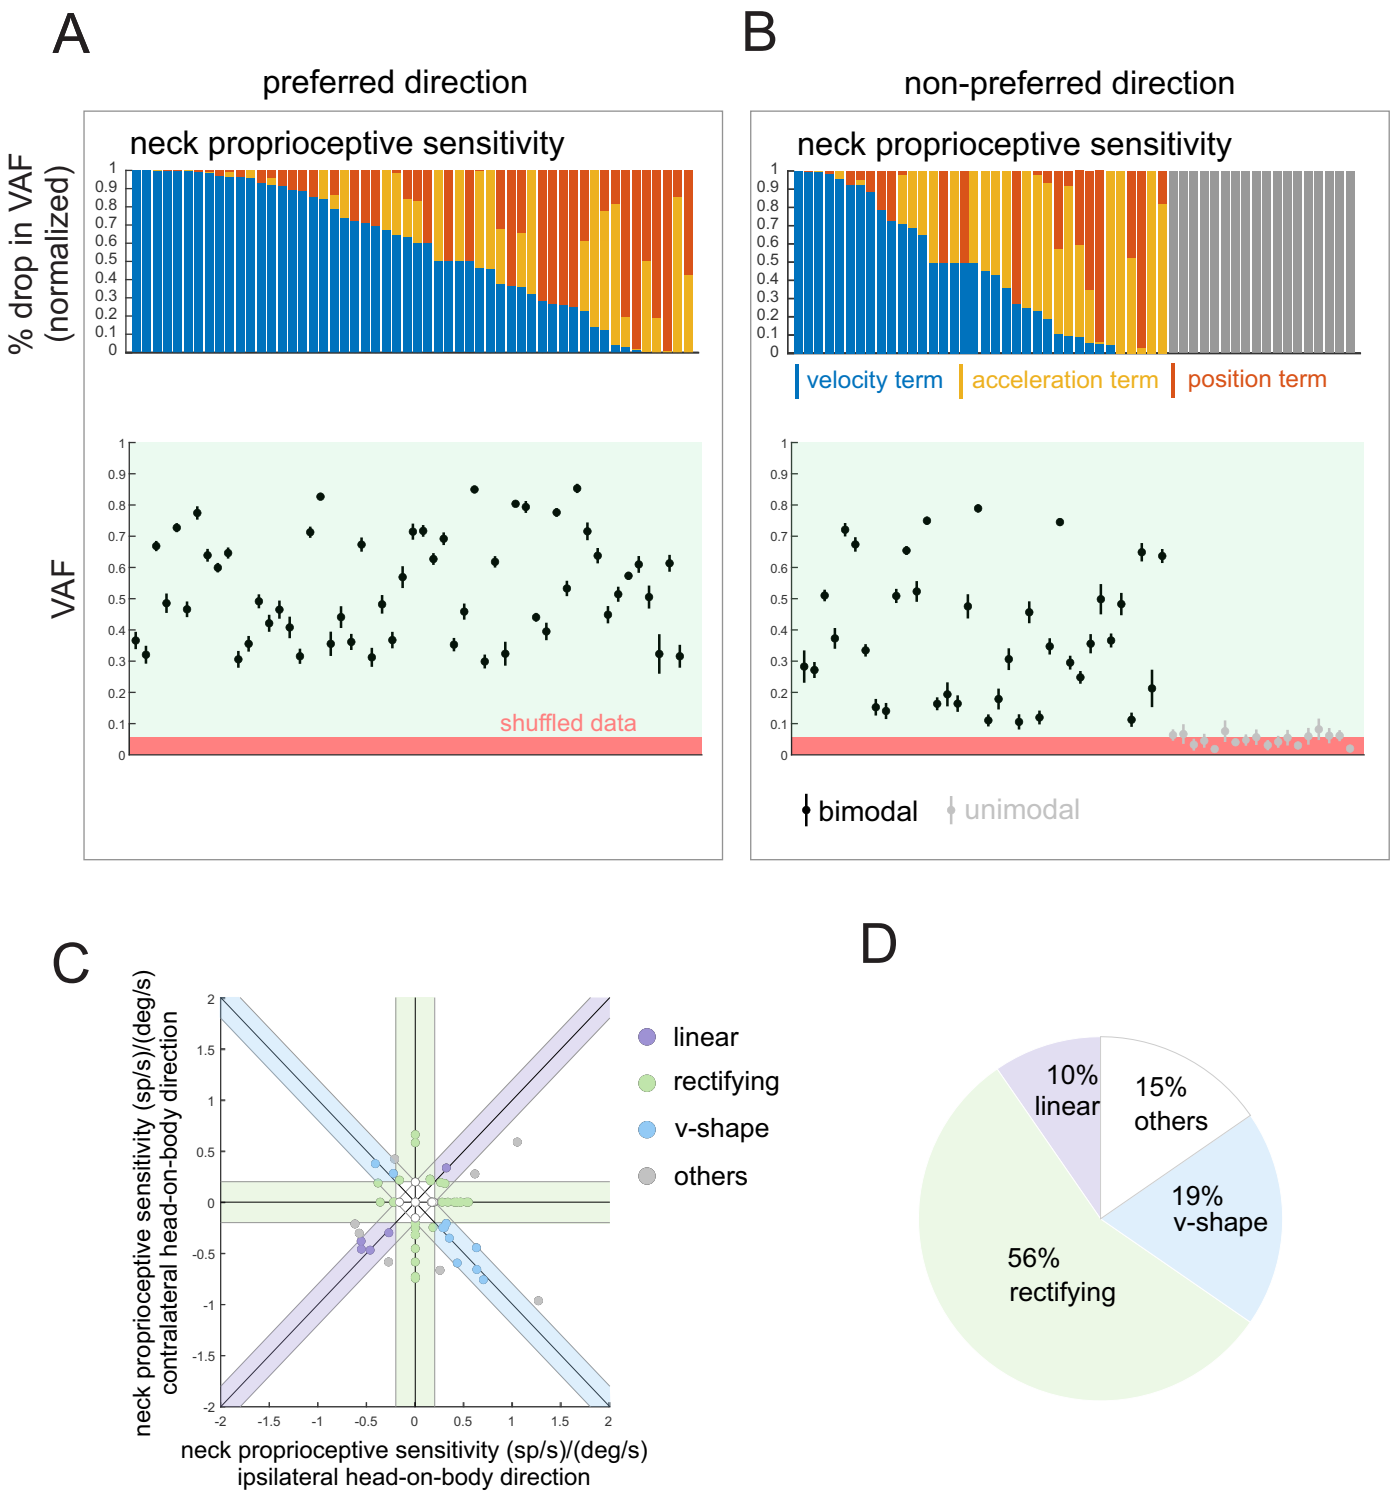

Supplement: supp [file elife-75018-supp-v1.zip]

Figure 5 - figure supplement 1

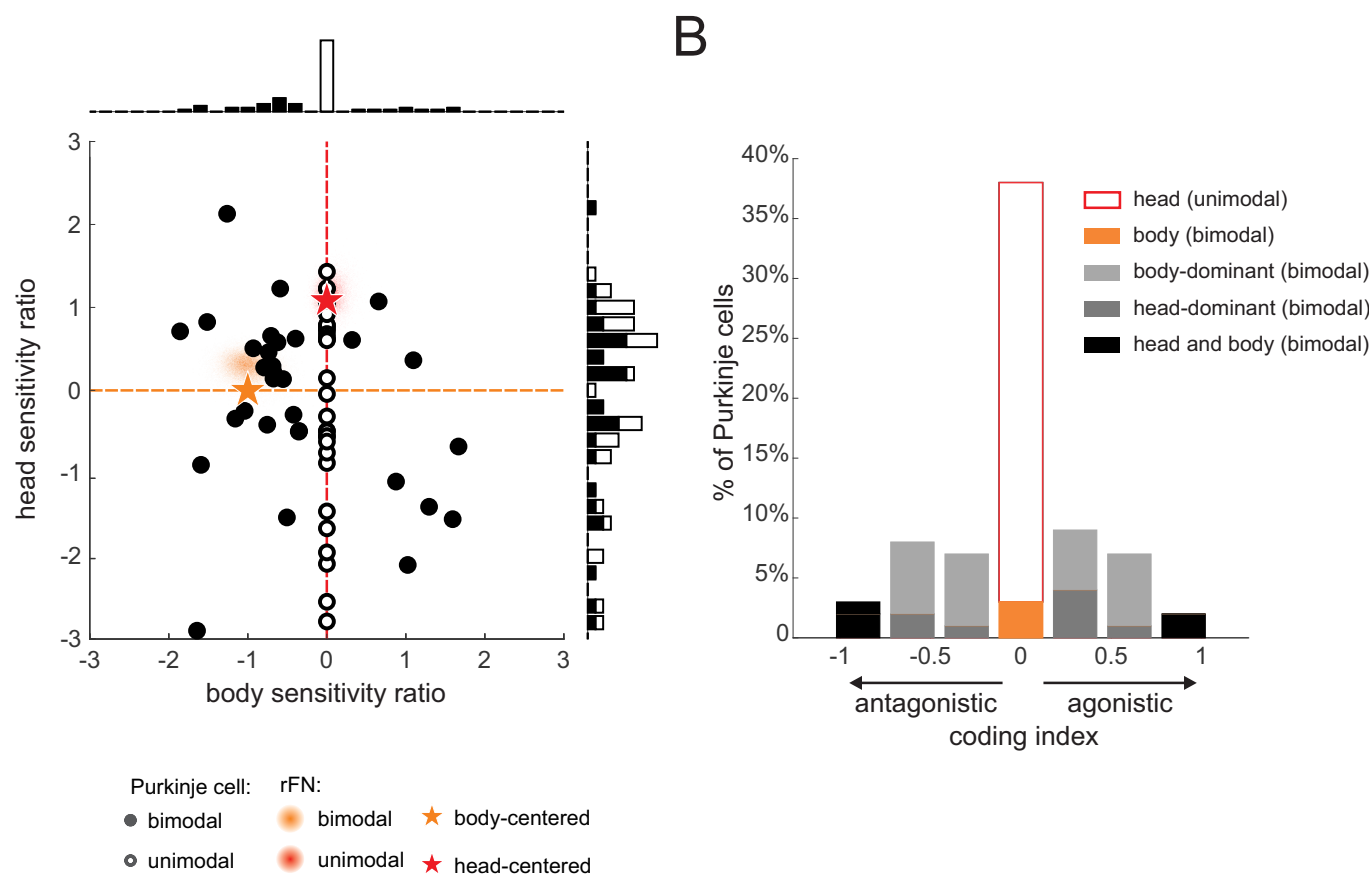

Supplement: supp [file elife-75018-supp-v1.zip]
